# Supplementary material
Source: publisher site journal article supplement (https://www.dovepress.com/article/454292)
Supplement: Supplementary file 1 [file get_supplementary_file.php]

**Appendix for:**

**Unveiling the Impact of Communication Network on Engineering Project Team Performance: The Interplay of Centralization and Tie Strength**

**Appendix A**

**Table A Key Instructions for the Main Experiment**

| key point | Content |
| --- | --- |
| Initial setup | Upon dividing the participants into teams, they are assigned roles, each endowed with distinct privileges and access to specific information repositories. Connection relationships denote the potential for information exchange between pairs, with only the roles represented by dark dots possessing the authority to synthesize this information. To foster interdependence among team members, each member is equipped with a unique information repository, containing ten exclusive pieces of information. |
| During the experimental process | Each step in the process encompasses specific task demands and helpful hints. Directed by these cues, participants rummage through their individual information repositories to unearth key information, which they subsequently share with their corresponding counterparts (communication restricted to pairwise interactions). Members vested with the power of integration amalgamate three distinct pieces of information to accomplish each process step. Notably, multiple process steps can be concurrently executed. |
| Task change | In Phase Three, the team will encounter three task changes at the first and second disruption time points. Specifically, three completed procedures within the process will be replaced with new ones, necessitating re-completion. |

**Appendix B**

**Table B Questionnaire in Phase One of Participant Filter**

| Item | Measure |
| --- | --- |
| 1 | Who can you communicate with? |
| 2 | How many messages can you send out per minute? |
| 3 | What is the ultimate goal of your team? |
| 4 | What are the requirements for completing each process? |
| 5 | Do you have the authority to assemble information to complete the process? |
